# Supplementary figures and images for: Retracted Article: Remote sensing of formaldehyde fumes in indoor environments
Source: Royal Society of Chemistry journal article supplement (doi:10.1039/c6ay00976j), 2016-01-01

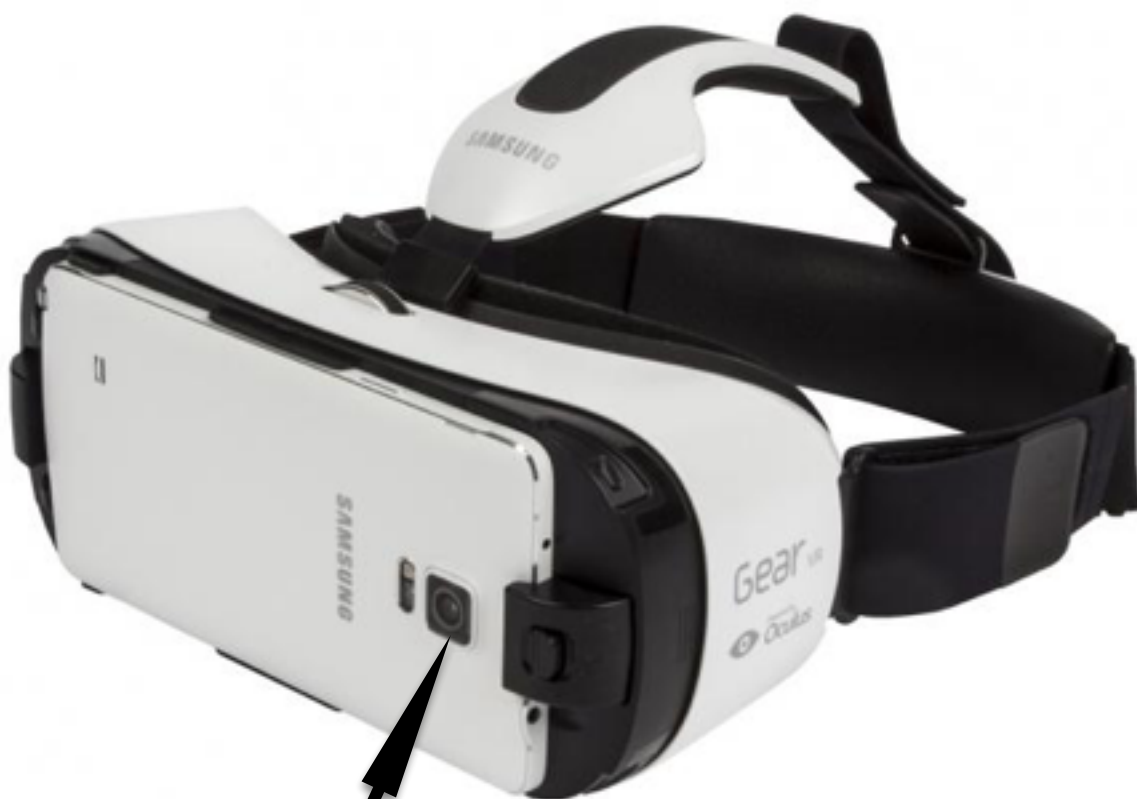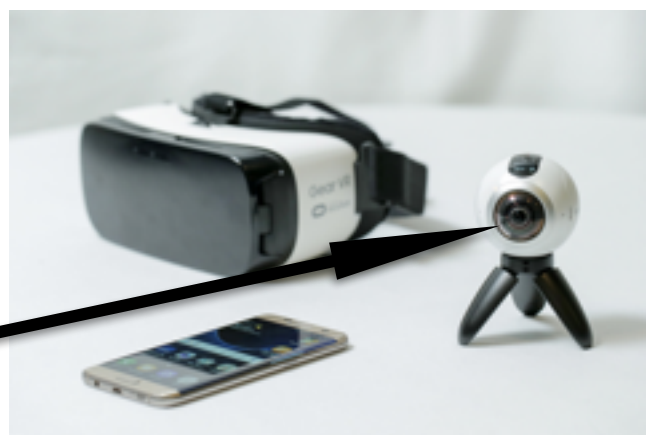

**Chromochromic  
sensor positions on  
Virtual reality Helmet  
and on 3D Camera**

Supplement: c6ay00976j1.pdf [file c6ay00976j1.pdf]
